# Supplementary material for: Highly simple and rapid synthesis of ultrathin gold nanowires with (111)-dominant facets and enhanced electrocatalytic properties
Source: Royal Society of Chemistry journal article supplement (doi:10.1039/c8ta06676k), 2018-01-01
Supplement: c8ta06676k1.pdf [file c8ta06676k1.pdf]

## Supporting Information

### **Highly simple and rapid synthesis of ultrathin gold nanowires with (111)-dominant facets and enhanced electrocatalytic properties**

*Xian Jiang,<sup>a,b</sup> Xiaoyu Qiu,<sup>a</sup> Gengtao Fu,<sup>a</sup> Jingze Sun,<sup>a</sup> Zhenna Huang,<sup>a</sup> Dongmei Sun,<sup>a</sup>  
Lin Xu,<sup>\*a</sup> Jiancheng Zhou <sup>\*b</sup> and Yawen Tang <sup>\*a</sup>*

<sup>a</sup> Jiangsu Key Laboratory of New Power Batteries, Jiangsu Collaborative Innovation Center of Biomedical  
Functional Materials, School of Chemistry and Materials Science, Nanjing Normal University, Nanjing  
210023, P. R. China. Email: xulin001@njnu.edu.cn; njuxulin@gmail.com and tangyawen@njnu.edu.cn

<sup>b</sup> School of Chemistry and Chemical Engineering, Southeast University, Nanjing, 211189, China. E-mail:  
jczhou@seu.edu.cn

## **Experimental**

### **Materials and reagents**

$\alpha$ -naphthol ( $C_{10}H_8O$ ) was purchased from Aladdin (Shanghai, China). Chloroauric acid ( $HAuCl_4$ ) was supplied by Shanghai Dibo Chemical Technology Co., Ltd. (Shanghai, China). Ethanol ( $C_2H_5OH$ ) was provided by Sinopharm Chemical Reagent Co. Ltd. (Shanghai, China). Deionized water was used throughout the experiments. All chemicals were of analytical reagent grade and used as received without further purification.

### **Characterizations**

Transmission electron microscopy (TEM) and high-resolution TEM (HRTEM) were performed on a JEOL JEM-2100F transmission electron microscopy operated at an accelerating voltage of 200 kV. Scanning electron microscopy (SEM) images and energy-dispersive X-ray (EDX) spectrum were acquired on a Hitachi S5500 SEM. X-ray diffraction (XRD) patterns of the samples were determined by a Model D/max-rC X-ray diffractometer using Cu K $\alpha$  radiation source ( $\lambda=1.5406 \text{ \AA}$ ) and operating at 40 kV and 100 mA. X-ray photoelectron spectroscopy (XPS) measurements were carried out with a Thermo VG Scientific ESCALAB 250 spectrometer with a monochromatic Al K $\alpha$  X-ray source. The binding energy was calibrated by means of the C1s peak energy of 284.6 eV. Thermogravimetric analyses (TGA) of the samples were conducted on a Perkin-Elmer thermal analysis system at a heating rate of  $10 \text{ }^\circ\text{C min}^{-1}$  under oxygen atmosphere.

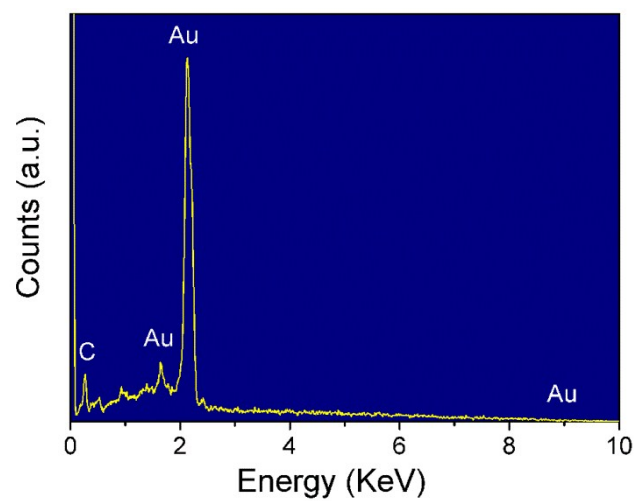

**Fig. S1** EDX spectrum of the resultant Au nanowires.

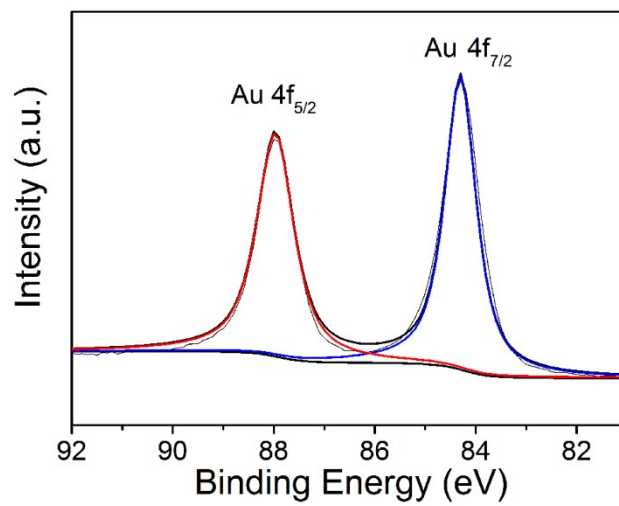

**Fig. S2** XPS spectrum of Au 4f region for the obtained Au nanowires.

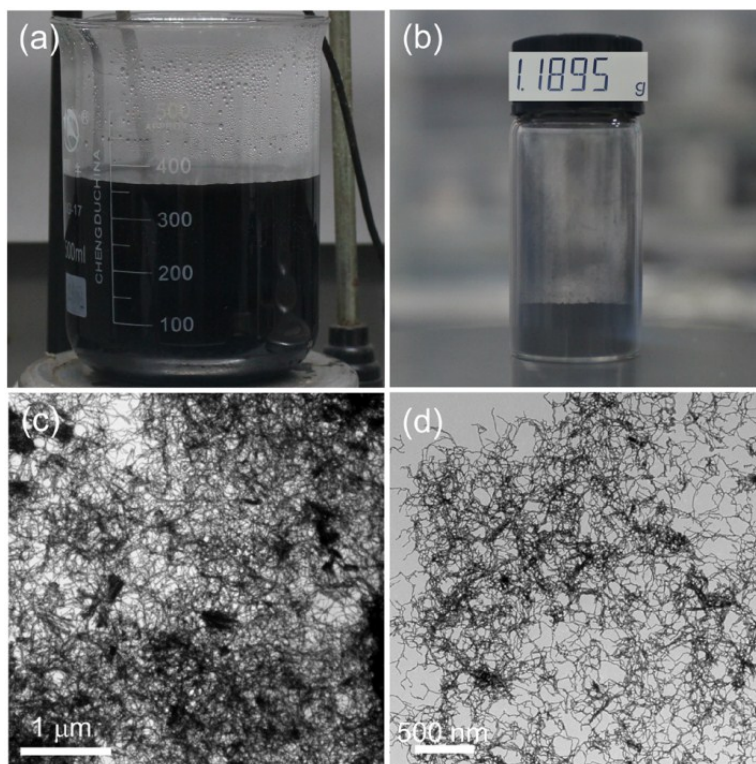

**Fig. S3** (a and b) Digital photos showing the large-scale synthesis of Au nanowires from a single batch, and (c and d) TEM images of the Au nanowires from large-scale synthesis.

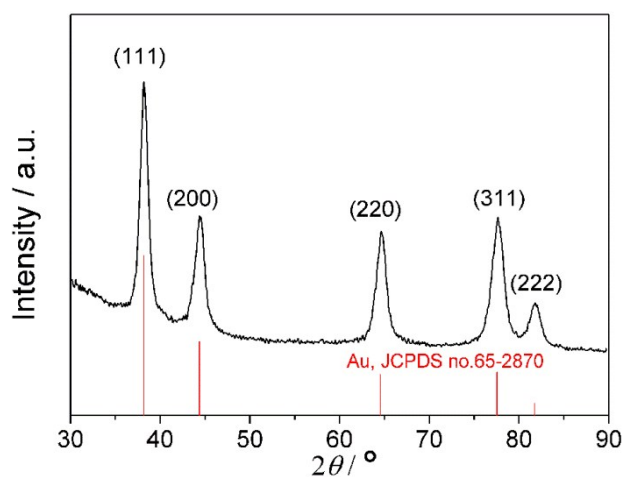

**Fig. S4** XRD pattern of the product collected upon the mixing of  $\text{HAuCl}_4$  and  $\alpha$ -naphthol solutions, suggesting the rapid formation of metallic Au.

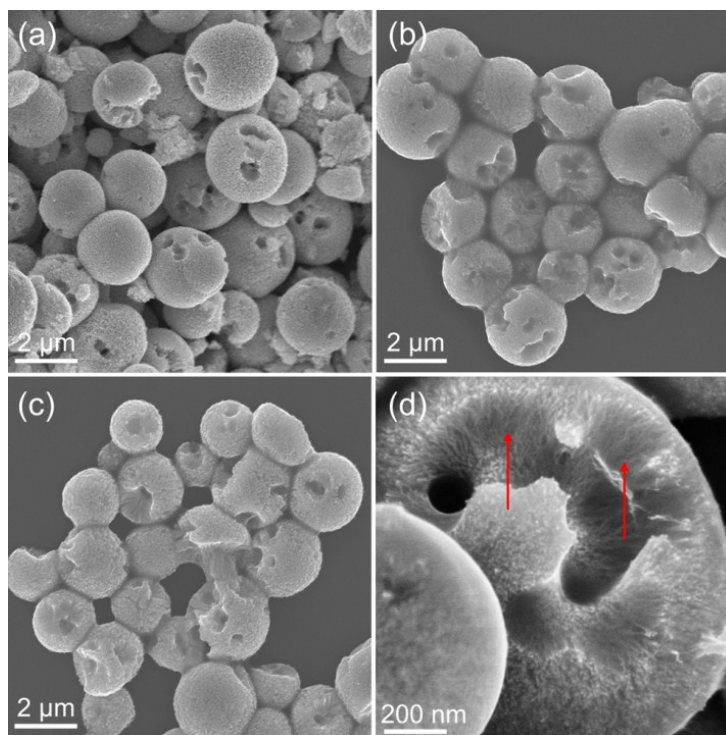

**Fig. S5** SEM images of the obtained Au nanowire-arrayed microspheres synthesized at different reaction temperatures. (a) 20 °C, (b) 40 °C, (c) 20 °C, and (d) magnified SEM image showing the arrayed structure of the Au microsphere.

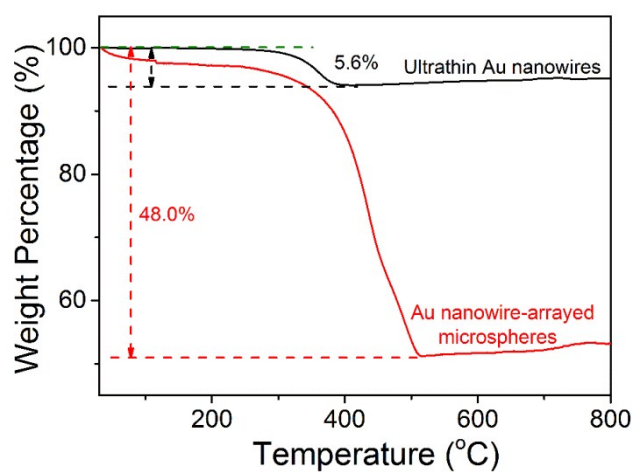

**Fig. S6** TGA curves of the as-prepared Au nanowire-arrayed microspheres and Au nanowires.

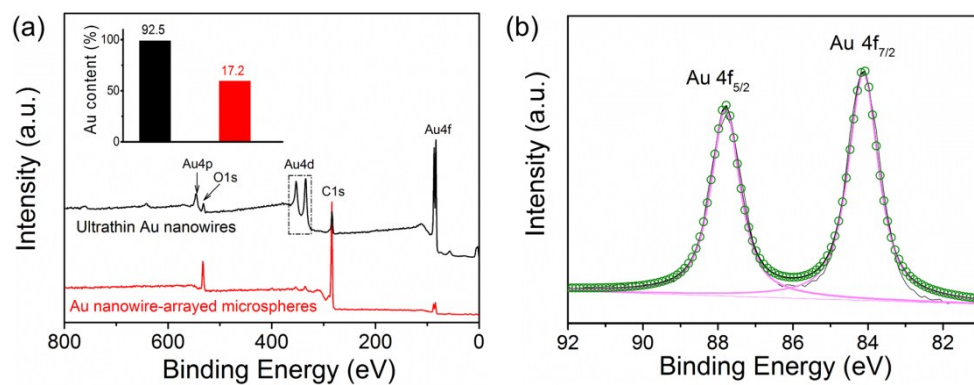

**Fig. S7** XPS spectra of the Au nanowire-arrayed microspheres and final Au nanowires.

(a) survey spectra of the two samples and (b) Au 4f region for the Au nanowire-arrayed microspheres.

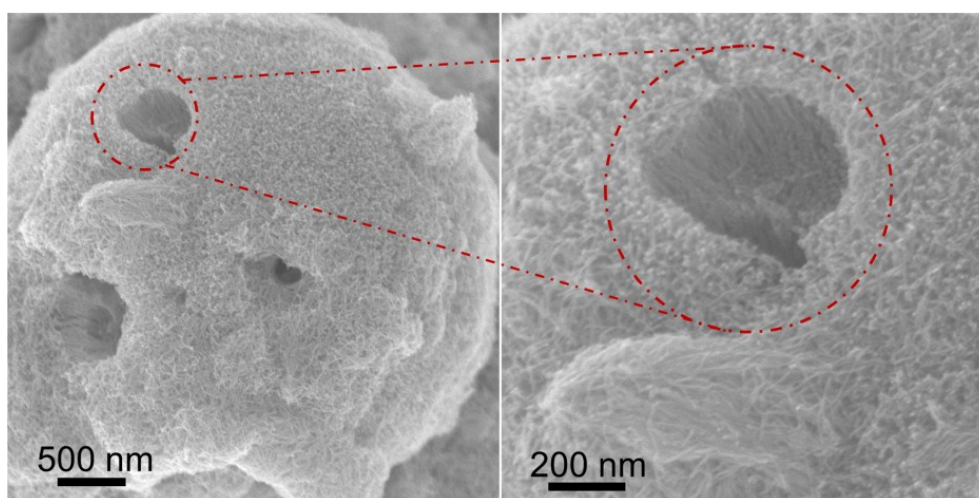

**Fig. S8** SEM images of the re-assembled Au nanowire arrays obtained by dispersing disordered Au nanowires in  $\alpha$ -naphthol ethanol solution.

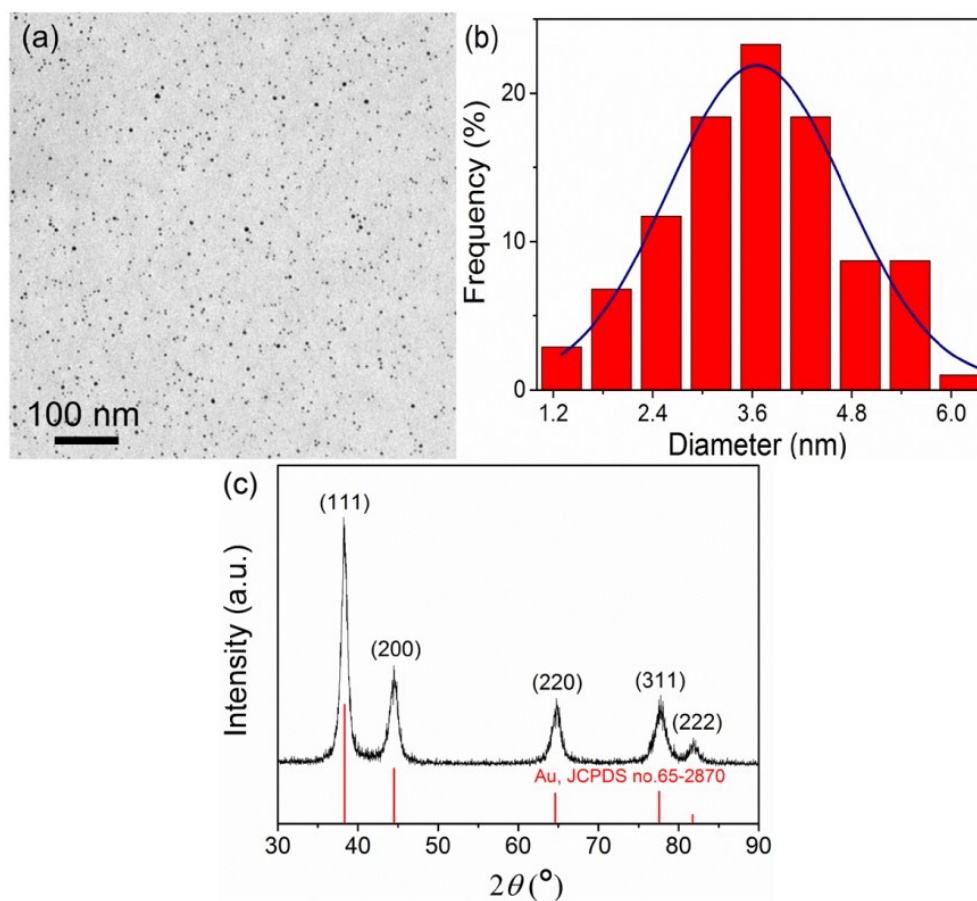

**Fig. S9** (a) TEM image, (b) corresponding size distribution and (c) XRD pattern of the Au nanoparticles synthesized according to the literature.<sup>1,2</sup>

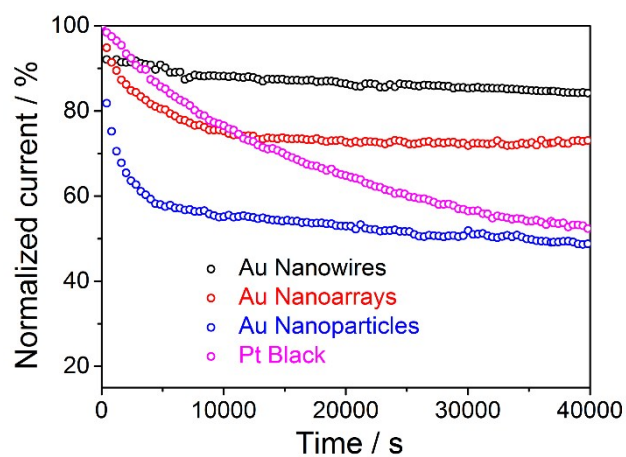

**Fig. S10** Chronoamperometric measurements of four catalysts at 0.5 V in O<sub>2</sub>-saturated 0.1 M KOH.

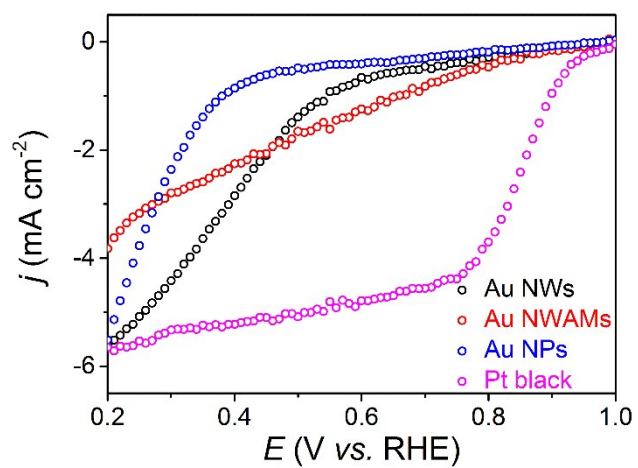

**Fig. S11** ORR LSV curves of the catalysts recorded in O<sub>2</sub>-saturated 0.1 M HClO<sub>4</sub> solution.



**Table S1** Comparison of the synthetic method of the Au nanowires in this work with other Au nanowires reported before.

| Number   | Solvent                       | $T^{(a)}$ / °C      | $t^{(b)}$     | $l^{(c)}$ / nm  | $d^{(d)}$ / nm | Ref              |
|----------|-------------------------------|---------------------|---------------|-----------------|----------------|------------------|
| <b>1</b> | <b>water + ethanol</b>        | <b>60</b>           | <b>~1 min</b> | <b>&gt;1000</b> | <b>4.6</b>     | <b>this work</b> |
| 2        | hexane                        | R.T. <sup>(e)</sup> | >48 h         | -               | ~1.0           | 3                |
| 3        | -                             | 1100                | 30 min        | 280-740         | 80-125         | 4                |
| 4        | triisopropylsilane            | R.T.                | 4-5 h         | >1000           | 1.6            | 5                |
| 5        | oleylamine + trichloromethane | 35                  | >5 days       | 10-3500         | 1.6            | 6                |
| 6        | water + toluene               | R.T.                | >1 h          | >1000           | ~5             | 7                |
| 7        | toluene                       | 55                  | 8 h           | >1000           | 2              | 8                |
| 8        | water                         | 37                  | 48 h          | >1000           | 13.1           | 9                |
| 9        | water                         | R.T.                | 24 h          | 100000          | 15             | 10               |
| 10       | water                         | R.T.                | >12 h         | 10000           | ~31.5          | 11               |
| 11       | oleylamine + oleic acid       | 80                  | 5 h           | >1000           | 3 or 9         | 12               |
| 12       | hexane                        | 60                  | 24-100 h      | 2000            | 1.8            | 13               |
| 13       | water                         | 30                  | 1-72 h        | >1000           | 45.3           | 14               |
| 14       | water + dichloromethane       | R.T.                | 72 h          | ~500            | ~20            | 15               |
| 15       | water + toluene               | R.T.                | >24 h         | <500            | <5.0           | 16               |
| 16       | water                         | 25                  | -             | <1000           | 30             | 17               |
| 17       | water + toluene               | R.T.                | 1 h           | <1000           | 5              | 18               |
| 18       | water                         | 180 & 25            | 8 h           | >1000           | 22             | 19               |
| 19       | n-hexane                      | 30                  | >3 h          | -               | 2              | 20               |
| 20       | hexane + oleylamine           | R.T.                | >36 h         | 500             | 2              | 21               |
| 21       | water                         | R.T.                | 30 min        | 650             | 15             | 22               |
| 22       | water                         | R.T.                | 1 h           | 1000            | 40-65          | 23               |
| 23       | water + ethanol               | R.T.                | >2 h          | >1000           | 6              | 24               |
| 24       | water                         | R.T.                | >52 h         | >1000           | 28-47          | 25               |
| 25       | toluene or benzene            | 55                  | 8 h           | >1000           | 1.8            | 26               |
| 26       | n-butanol + water             | R.T.                | 10 day        | >1000           | 13             | 27               |
| 27       | hexane                        | R.T.                | 4-5 h         | 2000            | 1.8            | 28               |
| 28       | water                         | 90                  | 30 min        | >1000           | 200            | 29               |
| 29       | oleylamine                    | H <sub>2</sub> O    | 4 days        | ~4000           | 1.6            | 30               |
| 30       | toluene                       | R.T.                | a few days    | ~1000           | 2              | 31               |
| 31       | water                         | R.T.                | >2 h          | 1000            | 50             | 32               |
| 32       | tetrahydrofuran               | R.T.                | 24 h          | 3000-6000       | 50             | 33               |
| 33       | water                         | 30                  | 20 h          | -               | 10             | 34               |
| 34       | water                         | 30                  | >12 h         | >1000           | 30-80          | 35               |

<sup>(a)</sup>  $T$  = Temperature, <sup>(b)</sup>  $t$  = time, <sup>(c)</sup>  $l$  = length; <sup>(d)</sup>  $d$  = diameter; <sup>(e)</sup> R.T. = Room Temperature.

**Table S2** Comparison of the ORR activity of the as-prepared Au nanowires with other Au-based catalysts reported before.

| Number   | Catalysts                          | $E_{\text{onset}}/V$ | $E_{1/2}/V$  | Electrolyte      | Loadings (mg cm <sup>-2</sup> ) | Ref.             |
|----------|------------------------------------|----------------------|--------------|------------------|---------------------------------|------------------|
| <b>1</b> | <b>Au nanowires</b>                | <b>1.06</b>          | <b>0.881</b> | <b>0.1 M KOH</b> | <b>0.1019</b>                   | <b>this work</b> |
| 2        | AuPd NCs/rGO                       | 0.92                 | 0.86         | 0.1 M KOH        | 0.0849                          | 36               |
| 3        | PtAu SLAs                          | 0.903                | 0.801        | 0.1 M KOH        | 0.0708                          | 37               |
| 4        | AuIr/C                             | -                    | 0.774        | 0.1 M NaOH       | 0.2548                          | 38               |
| 5        | AuPt NDs                           | 0.98                 | 0.87         | 0.1 M KOH        | 0.0849                          | 39               |
| 6        | Au-Ni(OH) <sub>2</sub> -NC/GCE     | 0.907                | ~0.65        | 0.1 M KOH        | -                               | 40               |
| 7        | AuPd@PdAu-PEI                      | 0.982                | 0.869        | 0.1 M NaOH       | 0.1019                          | 41               |
| 8        | AuPC-1                             | 0.95                 | 0.83         | 0.1 M KOH        | 0.0808                          | 42               |
| 9        | Au@TiO <sub>2</sub>                | 0.92                 | ~0.80        | 0.1 M NaOH       | -                               | 43               |
| 10       | AuNDs-GO                           | ~0.85                | 0.61         | 0.1 M KOH        | 0.04                            | 44               |
| 11       | Au-aerogel-CN <sub>x</sub>         | ~0.92                | ~0.855       | 0.5 M KOH        | 0.13                            | 45               |
| 12       | AuCNS-30%                          | 0.96                 | 0.85         | 0.1 M KOH        | 0.0808                          | 46               |
| 13       | Au(51k-18k)/rGO                    | ~0.714               | -            | 0.1 M KOH        | -                               | 47               |
| 14       | PO <sub>4</sub> -CDs-6/Au          | 0.998                | ~0.80        | 0.1 M KOH        | 0.01414                         | 48               |
| 15       | Au/rGO                             | 0.864                | ~0.764       | 0.1 M KOH        | 0.1                             | 49               |
| 16       | RGO/AuNPs                          | 0.8413               | -            | 0.1 M KOH        | -                               | 50               |
| 17       | s-Graphene/PyPBI/Au <sub>1.6</sub> | 0.874                | ~0.664       | 0.1 M KOH        | 0.0053                          | 51               |

## References

1. J. Pérez-Juste, L. M. Liz-Marzán, S. Carnie, D. Y. C. Chan and P. Mulvaney, *Adv. Funct. Mater.*, 2004, **14**, 571-579.
2. C. M. Sánchez-Sánchez, F. J. Vidal-Iglesias, J. Solla-Gullón, V. Montiel, A. Aldaz, J. M. Feliu and E. Herrero, *Electrochim. Acta*, 2010, **55**, 8252-8257.
3. H. Cui, C. Hong, A. Ying, X. Yang and S. Ren, *ACS Nano*, 2013, **7**, 7805-7811.
4. M. Jung, H. Noh, Y. J. Doh, W. Song, Y. Chong, M. S. Choi, Y. Yoo, K. Seo, N. Kim and B. C. Woo, *ACS Nano*, 2011, **5**, 2271-2276.
5. A. Sanchez-Iglesias, B. Rivas-Murias, M. Grzelczak, J. Perez-Juste, L. M. Liz-Marzan, F. Rivadulla and M. A. Correa-Duarte, *Nano Lett.*, 2012, **12**, 6066-6070.
6. N. Pazospérez, D. Baranov, S. Irsen, M. Hilgendorff, L. M. Lizmarzán and M. Giersig, *Langmuir*, 2008, **24**, 9855-9860.
7. G. Ramanath, J. D'ArcyGall, T. Maddanimath, A. V. Ellis, P. G. Ganesan, R. Goswami, A. Kumar and K. Vijayamohan, *Langmuir*, 2004, **20**, 5583-5587.
8. C. Morita, H. Tanuma, C. Kawai, Y. Ito, Y. Imura and T. Kawai, *Langmuir*, 2013, **29**, 1669-1675.
9. H. Yang, M. Du, T. Odoom-Wubah, J. Wang, D. Sun, J. Huang and Q. Li, *J. Chem. Technol. Biotechnol.*, 2014, **89**, 1410-1418.
10. C. Zhu, H. C. Peng, J. Zeng, J. Liu, Z. Gu and Y. Xia, *J. Am. Chem. Soc.*, 2012, **134**, 20234-20237.
11. F. Kim, K. Sohn, J. Wu and J. Huang, *J. Am. Chem. Soc.*, 2008, **130**, 14442-14443.
12. C. Wang, Y. Hu, C. M. Lieber and S. Sun, *J. Am. Chem. Soc.*, 2008, **130**, 8902-8903.
13. X. Lu, M. S. Yavuz, H. Y. Tuan, B. A. Korgel and Y. Xia, *J. Am. Chem. Soc.*, 2008, **130**, 8900-8901.
14. M. Wang, T. Kong, X. Jing, Y.-K. Hung, D. Sun, L. Lin, Y. Zheng, J. Huang and Q. Li, *Ind. Eng. Chem. Res.*, 2012, **51**, 16651-16659.
15. G. Lu, C. Li and G. Shi, *Chem. Mater.*, 2007, **19**, 3433-3440.
16. B. Li, B. Jiang, H. Tang and Z. Lin, *Chem. Sci.*, 2015, **6**, 6349-6354.
17. X. Gao, F. Lu, B. Dong, Y. Liu, Y. Gao and L. Zheng, *Chem. Commun.*, 2015, **51**, 843-846.
18. T. Maddanimath, A. Kumar, J. D'Arcy-Gall, P. G. Ganesan, K. Vijayamohan and G. Ramanath, *Chem. Commun.*, 2005, 1435-1437.
19. T. Guo, G. Yu, Y. Zhang, H. Xiang, F. Chang and C.-J. Zhong, *J. Phys. Chem. C*, 2017, **121**, 3108-3116.
20. A. Roy, S. Kundu, K. Muller, A. Rosenauer, S. Singh, P. Pant, M. P. Gururajan, P. Kumar, J. Weissmuller, A. K. Singh and N. Ravishankar, *Nano Lett.*, 2014, **14**, 4859-4866.
21. W. Zhu, Y. J. Zhang, H. Zhang, H. Lv, Q. Li, R. Michalsky, A. A. Peterson and S. Sun, *J. Am. Chem. Soc.*, 2014, **136**, 16132-16135.
22. S. Kundu, *J. Mater. Chem. C*, 2013, **1**, 831-842.
23. H. Li, Y.-J. Li, L.-L. Sun and X.-L. Zhao, *Electrochim. Acta*, 2013, **108**, 74-78.
24. J. He, Y. Wang, Y. Feng, X. Qi, Z. Zeng, Q. Liu, S. T. Wei, C. L. Gan, H. Zhang and H. Chen, *ACS Nano*, 2013, **7**, 2733-2740.

25. G. D. Sulka, A. Brzózka and L. Liu, *Electrochim. Acta*, 2011, **56**, 4972-4979.
26. Y. Imura, H. Tanuma, H. Sugimoto, R. Ito, S. Hojo, H. Endo, C. Morita and T. Kawai, *Chem. Commun.*, 2011, **47**, 6380-6382.
27. M.-H. Wang, Y.-J. Li, Z.-X. Xie, C. Liu and E. S. Yeung, *Mater. Chem. Phys.*, 2010, **119**, 153-157.
28. H. Feng, Y. Yang, Y. You, G. Li, J. Guo, T. Yu, Z. Shen, T. Wu and B. Xing, *Chem. Commun.*, 2009, 1984-1986.
29. T. Wang, X. Hu, J. Wang and S. Dong, *Talanta*, 2008, **75**, 455-460.
30. Z. Huo, C. K. Tsung, W. Huang, X. Zhang and P. Yang, *Nano Lett.*, 2008, **8**, 2041-2044.
31. A. Halder and N. Ravishankar, *Adv. Mater.*, 2007, **19**, 1854-1858.
32. C.-L. Xu, L. Zhang, H.-L. Zhang and H.-L. Li, *Appl. Surf. Sci.*, 2005, **252**, 1182-1186.
33. J. U. Kim, S. H. Cha, K. Shin, J. Y. Jho and J. C. Lee, *Adv. Mater.*, 2004, **16**, 459-464.
34. S. K. Das, A. R. Das and A. K. Guha, *Small*, 2010, **6**, 1012-1021.
35. R. Dou and B. Derby, *Scr. Mater.*, 2008, **59**, 151-154.
36. X. X. Lin, X. F. Zhang, A. J. Wang, K. M. Fang, J. Yuan and J. J. Feng, *J. Colloid Interface Sci.*, 2017, **499**, 128-137.
37. J.-J. Feng, L.-L. He, R. Fang, Q.-L. Wang, J. Yuan and A.-J. Wang, *J. Power Sources*, 2016, **330**, 140-148.
38. L. Yuan, Z. Yan, L. Jiang, E. Wang, S. Wang and G. Sun, *J. Energy Chem.*, 2016, **25**, 805-810.
39. X. Weng, Y. Liu, K.-K. Wang, J.-J. Feng, J. Yuan, A.-J. Wang and Q.-Q. Xu, *Int. J. Hydrogen Energy*, 2016, **41**, 18193-18202.
40. P. Kanagavalli, R. Sudha, S. Boopathi and S. S. Kumar, *Electrochem. Commun.*, 2017, **82**, 61-65.
41. Q. Xue, G. Xu, R. Mao, H. Liu, J. Zeng, J. Jiang and Y. Chen, *J. Energ. Chem.*, 2017, **25**, 805-810.
42. L. Wang, Z. Tang, W. Yan, H. Yang, Q. Wang and S. Chen, *ACS Appl. Mater. Interfaces*, 2016, **8**, 20635-20641.
43. L. Guo, K. Liang, K. Marcus, Z. Li, L. Zhou, P. D. Mani, H. Chen, C. Shen, Y. Dong, L. Zhai, K. R. Coffey, N. Orlovskaya, Y. H. Sohn and Y. Yang, *ACS Appl. Mater. Interfaces*, 2016, **8**, 34970-34977.
44. X.-R. Li, X.-L. Li, M.-C. Xu, J.-J. Xu and H.-Y. Chen, *J. Mater. Chem. A*, 2014, **2**, 1697-1703.
45. M. K. Kundu, T. Bhowmik and S. Barman, *J. Mater. Chem. A*, 2015, **3**, 23120-23135.
46. Q. Wang, L. Wang, Z. Tang, F. Wang, W. Yan, H. Yang, W. Zhou, L. Li, X. Kang and S. Chen, *Nanoscale*, 2016, **8**, 6629-6635.
47. S.-S. Kim, Y.-R. Kim, T. D. Chung and B.-H. Sohn, *Adv. Funct. Mater.*, 2014, **24**, 2764-2771.
48. J. Liu, S. Zhao, C. Li, M. Yang, Y. Yang, Y. Liu, Y. Lifshitz, S.-T. Lee and Z. Kang, *Adv. Energy Mater.*, 2016, **6**, 1502039-1502048.
49. H. Yin, H. Tang, D. Wang, Y. Gao and Z. Tang, *ACS Nano*, 2012, **6**, 8288-8297.
50. X. Qiu, W. Zhou, C. Qi, D. Cheng and Y. Ouchi, *ChemElectroChem*, 2017, **4**, 992-996.

51. T. Fujigaya, C. Kim, Y. Hamasaki and N. Nakashima, *Sci. Rep.*, 2016, **6**, 21314-21323.
